# Supplementary material for: Scale-dependent relationships between soil organic carbon stocks, land-use types and biophysical characteristics in a tropical montane landscape
Source: Copernicus journal article supplement (doi:10.5194/soil-2016-66), 2016-10-12
Supplement: Supplementary file [file soil-2016-66-AC2-supplement.pdf]

**Table: Coefficient estimates<sup>a</sup> ( $\pm$  SE) of effects of soil texture, vegetation characteristics and topographical attributes on SOC concentrations and total SOC stocks in all land-use types (regenerating or highly disturbed forest and mature forest combined, tea plantation and grassland combined) in a tropical montane landscape in SW China.**

| Response                                               | Effect                                                                   | All land-use types combined (n=27) |              |
|--------------------------------------------------------|--------------------------------------------------------------------------|------------------------------------|--------------|
|                                                        |                                                                          | Estimate                           | P value      |
| SOC concentration (%)<br>at 0-0.15 m                   | Intercept                                                                | 1.52 (1.02)                        | 0.14         |
|                                                        | Land-use type <sup>b</sup>                                               | Not included                       | Not included |
|                                                        | Silt-plus-clay percentage (%)                                            | 0.01 (0.01)                        | 0.34         |
|                                                        | ECEC <sup>c</sup> at 0.6-0.9 m (cmol <sub>c</sub> kg <sup>-1</sup> clay) |                                    | ns           |
|                                                        | Litter layer carbon stock (Mg C ha <sup>-1</sup> )                       | 0.17 (0.04)                        | <0.01        |
|                                                        | Litter layer C:N ratio                                                   |                                    |              |
|                                                        | Tree basal area (m <sup>2</sup> ha <sup>-1</sup> )                       | 0.04 (0.01)                        | <0.01        |
|                                                        | Slope (%)                                                                |                                    | ns           |
|                                                        | Relative elevation <sup>d</sup> (m)                                      | 0.003 (0.001)                      | <0.01        |
|                                                        | Compound Topographic Index                                               |                                    | ns           |
| SOC concentration (%)<br>at 0.15-0.30 m                | Intercept                                                                | 1.41 (0.80)                        | 0.08         |
|                                                        | Land-use type <sup>b</sup>                                               | Not included                       | Not included |
|                                                        | Silt-plus-clay percentage (%)                                            | 0.008 (0.01)                       | 0.38         |
|                                                        | ECEC <sup>c</sup> at 0.6-0.9 m (cmol <sub>c</sub> kg <sup>-1</sup> clay) |                                    | ns           |
|                                                        | Litter layer carbon stock (Mg C ha <sup>-1</sup> )                       | 0.17 (0.03)                        | <0.01        |
|                                                        | Litter layer C:N ratio                                                   |                                    | ns           |
|                                                        | Tree basal area (m <sup>2</sup> ha <sup>-1</sup> )                       | 0.009 (0.01)                       | <0.01        |
|                                                        | Slope (%)                                                                |                                    | ns           |
|                                                        | Relative elevation <sup>d</sup> (m)                                      | 0.002 (0.001)                      | 0.04         |
|                                                        | Compound Topographic Index                                               |                                    | ns           |
| Total SOC stock (Mg C ha <sup>-1</sup> )<br>at 0-0.9 m | Intercept                                                                | 120.61 (22.29)                     | <0.01        |
|                                                        | Land-use type <sup>b</sup>                                               | Not included                       | Not included |
|                                                        | Silt-plus-clay percentage (%)                                            |                                    | ns           |
|                                                        | ECEC <sup>c</sup> at 0.6-0.9 m (cmol <sub>c</sub> kg <sup>-1</sup> clay) |                                    | ns           |
|                                                        | Litter layer carbon stock (Mg C ha <sup>-1</sup> )                       | 5.21 (1.39)                        | <0.01        |
|                                                        | Litter layer C:N ratio                                                   |                                    | ns           |
|                                                        | Tree basal area (m <sup>2</sup> ha <sup>-1</sup> )                       | 0.79 (0.31)                        | 0.01         |
|                                                        | Slope (%)                                                                |                                    | ns           |
|                                                        | Relative elevation <sup>d</sup> (m)                                      | 0.07 (0.04)                        | 0.08         |
|                                                        | Compound Topographic Index                                               |                                    | ns           |

<sup>a</sup>Linear mixed effects models with sampling plot as random intercept. All effects were included in the full model, and model simplification resulted in the minimum adequate model. ns - not significant (i.e., the effects excluded by model simplifications)

<sup>b</sup>Land-use type has not been included as a categorical factor in the full model.

<sup>c</sup>ECEC, Effective Cation Exchange Capacity.

<sup>d</sup>Relative elevation is the change in elevation compared to the lowest situated sampling plot.
